# Supplementary material
Source: PubMed Central journal article supplement (PMC7013226)
Supplement: ajtr0012-0191-f6.pdf [file ajtr0012-0191-f6.pdf]

# Caerin peptide gel inhibits HPV+ cell growth

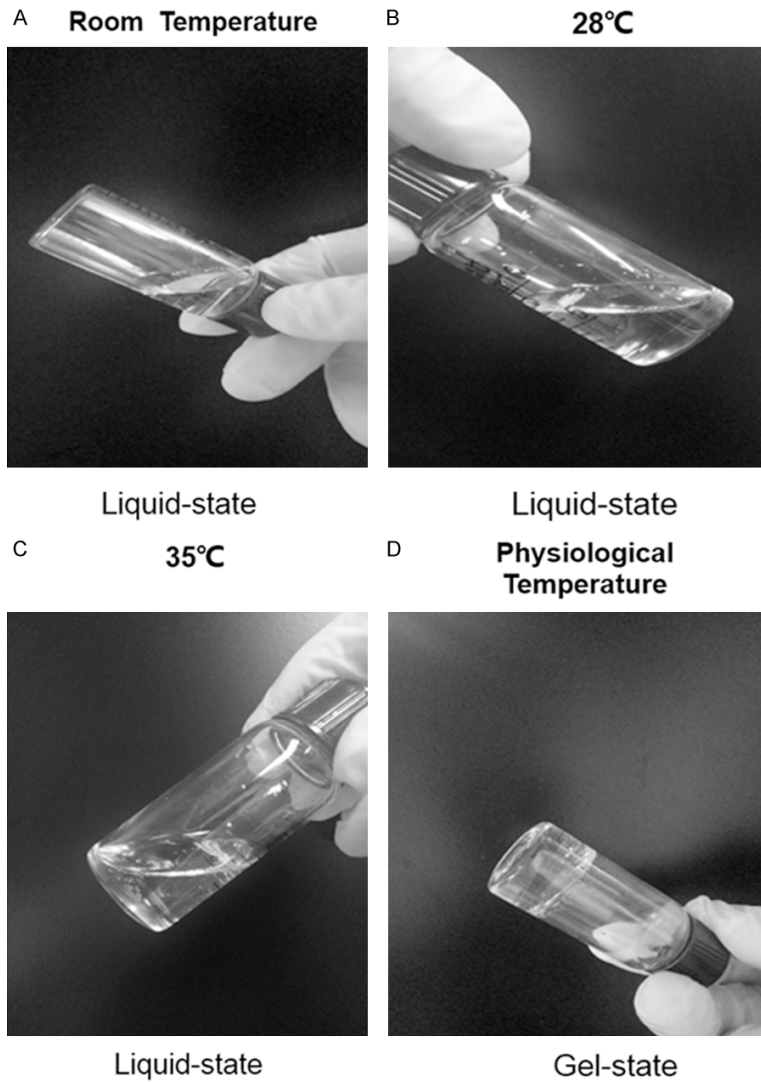

**Figure S1.** Aqueous solutions of F1/F3 gel exhibit thermo-reversible properties. The F1/F3 gel is in a liquid form at (A) room temperature (22 °C), (B) 28 °C, and (C) 35 °C. (D) The transition from liquid to gel occurs at physiological temperature (37 °C).

**Table S1.** Viscosity of the gel matrix, P3 gel, and F1/F3 gel (mPa-s)

| Gel type   | 25 °C | 37 °C              |
|------------|-------|--------------------|
| Gel matrix | 26.4  | $1.34 \times 10^5$ |
| P3 gel     | 23.2  | $1.30 \times 10^5$ |
| F1/F3 gel  | 25.5  | $1.31 \times 10^5$ |

## Caerin peptide gel inhibits HPV+ cell growth

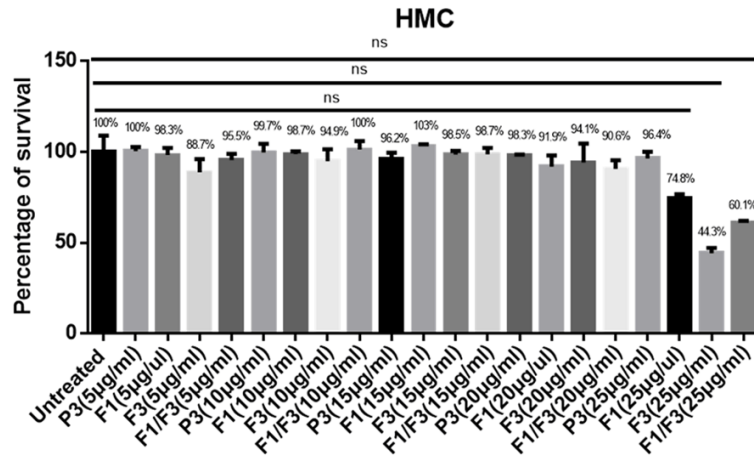

**Figure S2.** Cell survival of HMC cells treated with F1 and/or F3 peptide gel. Approximately  $5 \times 10^3$  HMC cells, which are primary human mesangial cell line cells, were cultured either in media alone or with different concentrations (5, 10, 15, 20, or 25  $\mu\text{g/ml}$ ) of F1, F3, F1/F3, or control gel overnight before the MTT assay was performed. Each bar represents the means of three replicates (performed in triplicate), and the error bars represent the standard deviations.
